# Supplementary material for: An injectable, naproxen-conjugated, supramolecular hydrogel with ultra-low critical gelation concentration—prepared from a known folate receptor ligand
Source: Royal Society of Chemistry journal article supplement (doi:10.1039/d2sm00121g), 2022-01-01
Supplement: d2sm00121g1.pdf [file d2sm00121g1.pdf]

## Supplementary Information

### An injectable, naproxen-conjugated, supramolecular hydrogel with ultra-low critical gelation concentration — prepared from a known folate receptor ligand

Carlos B. P. Oliveira,<sup>a</sup> Sérgio R. S. Veloso,<sup>b</sup> Pedro R. Figueiredo,<sup>c,d</sup> Alexandra T. P. Carvalho,<sup>c,e</sup> Loic Hilliou,<sup>f</sup> Renato B. Pereira,<sup>g</sup> David M. Pereira,<sup>g</sup> José A. Martins,<sup>a</sup> Paula M. T. Ferreira,<sup>a</sup> Peter J. Jervis\*<sup>a</sup>

<sup>a</sup> Centre of Chemistry (CQUM), University of Minho, Campus de Gualtar, 4710-057 Braga, Portugal.

<sup>b</sup> Centre of Physics (CFUM), University of Minho, Campus de Gualtar, 4710-057 Braga, Portugal.

<sup>c</sup> Institute for Polymers and Composites/I3N, Department of Polymer Engineering, University of Minho, Campus de Azurém, 4800-058 Guimarães, Portugal.

<sup>d</sup> REQUIMTE/LAQV, Lab. of Pharmacognosy, Dep. of Chemistry, Faculty of Pharmacy, University of Porto, R. Jorge Viterbo Ferreira, 228, 4050-313 Porto, Portugal.

#### Contents:

|           |                                                                                                               |
|-----------|---------------------------------------------------------------------------------------------------------------|
| Pages 2-3 | Synthetic procedures and characterisation data for compounds <b>3</b> , <b>4</b> , <b>6</b> and <b>7</b> .    |
| Pages 4   | <sup>1</sup> H and <sup>13</sup> C NMR spectra for compound <b>1</b> in DMSO-d <sub>6</sub>                   |
| Pages 5   | <sup>1</sup> H and <sup>13</sup> C NMR spectra for compound <b>2</b> in DMSO-d <sub>6</sub>                   |
| Page 6    | Figures S1 and S2 related to molecular dynamics of compounds <b>1</b>                                         |
| Page 7-8  | Figures S3 and Tables S1/S2: Fitting the drug release data to the Korsmeyer-Peppas model of release kinetics. |
| Page 9    | Figures S4 and S5 – Rheology: Gelation kinetics                                                               |
| Page 10   | Figure S6 – Rapid gelation of compound <b>1</b> after being expelled through a syringe needle                 |
| Page 10   | Figure S7 – Synthetic scheme for the synthesis of compound <b>8</b> .                                         |
| Page 10   | References                                                                                                    |

## Synthesis of compounds **3**, **4**, **6** and **7**

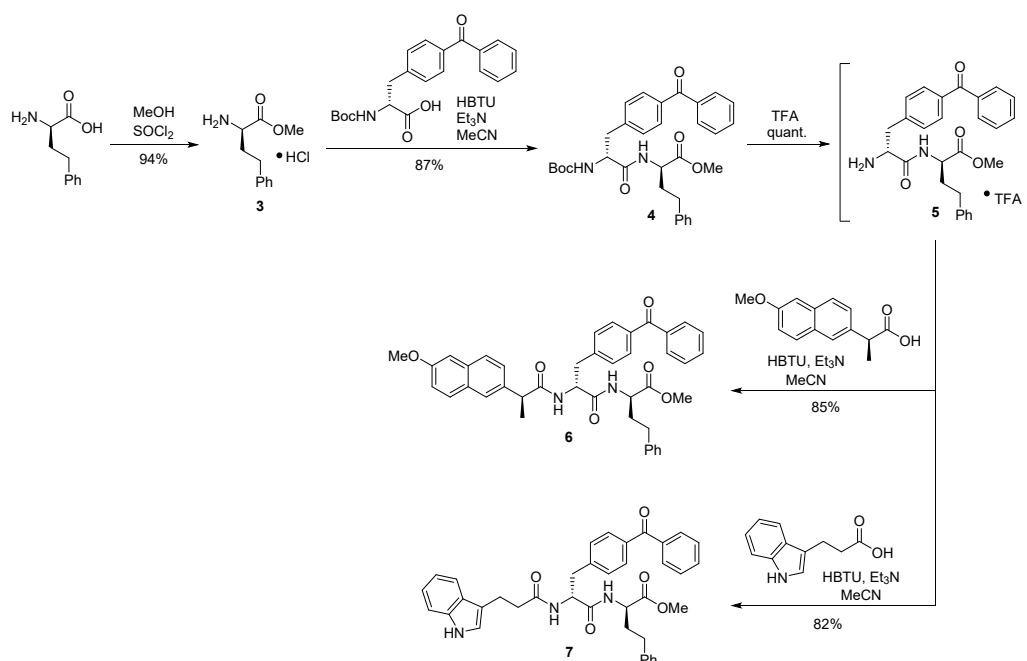

**H-D-HPhe-OMe.HCl (3)**. Thionyl chloride (1.21 mL, 16.7 mmol) was slowly added to cooled (0 °C) MeOH (12 mL) over 5 min. D-homophenylalanine (1.00 g, 5.58 mmol) was then added slowly, and the temperature of the mixture was raised to 40 °C and left for 4 h. The solvent was removed under reduced pressure to afford a white solid, which was washed with Et<sub>2</sub>O (12 mL). Removal of residual Et<sub>2</sub>O under reduced pressure afforded H-D-HPhe-OMe.HCl (**3**) as a white solid (1.20 g, 94%). <sup>1</sup>H NMR (300 MHz, DMSO-d<sub>6</sub>, δ): 2.04-2.13 (m, 1H, γ-CH<sub>2</sub>Ph), 2.56-2.68 (m, 1H, β-CH<sub>A</sub>H<sub>B</sub>), 2.70-2.80 (m, 1H, β-CH<sub>A</sub>H<sub>B</sub>), 3.73 (s, 3H, CO<sub>2</sub>CH<sub>3</sub>), 4.00 (m, 1H, α-CH), 7.17-7.23 (m, 3H, PhH), 7.27-7.33 (m, 2H, PhH), 8.65 (br s, NH<sub>3</sub><sup>+</sup>). <sup>13</sup>C NMR (100.6 MHz, DMSO-d<sub>6</sub>, δ): 30.2 (CH<sub>2</sub>, β-CH<sub>2</sub> of HPhe), 31.1 (CH<sub>2</sub>, γ-CH<sub>2</sub> of HPhe), 51.5 (CH, α-CH of HPhe), 52.7 (CH<sub>3</sub>, CO<sub>2</sub>CH<sub>3</sub>), 126.2 (CH, Ar), 128.3 (CH, Ar), 128.4 (CH, Ar), 140.2 (C, Ar), 169.7 (C, C=O). m/z (TOF ES<sup>+</sup>) 194.1 ([M + H]<sup>+</sup>, 100%).

**Boc-D-BPh-D-HPhe-OMe (4)**. Boc-D-BPhe-OH (200 mg, 0.54 mmol) was dissolved in MeCN (5 mL) and cooled to 0 °C. H-D-HPhe-OMe (**3**) (124 mg, 0.54 mmol), Et<sub>3</sub>N (225 μL, 1.62 mmol) and HBTU (225 mg, 0.59 mmol) were added sequentially, with 2 min between each addition, and the mixture was stirred at rt overnight. The solvent was removed under reduced pressure to afford a residue that was partitioned between EtOAc (50 mL) and KHSO<sub>4</sub> (50 mL, 1 M). After separation of the phases, the organic phase was thoroughly washed with KHSO<sub>4</sub> (1 M, 2 × 50 mL), NaHCO<sub>3</sub> (1 M, 3 × 50 mL), and brine (3 × 50 mL) and then dried with MgSO<sub>4</sub>. Filtration followed by removal of the solvent under reduced pressure afforded compound **4** (248 mg, 87%). <sup>1</sup>H-NMR (400 MHz, CDCl<sub>3</sub>, δ): 1.42 (s, 9H, O(CH<sub>3</sub>)<sub>3</sub>), 1.96-2.05 (m, 1H, β-CH<sub>A</sub>H<sub>B</sub> of HPhe), 2.14-2.23 (m, 1H, β-CH<sub>A</sub>H<sub>B</sub>), 2.61 (app. t, 2H, J = 8.0, γ-CH<sub>2</sub> of HPhe), 3.08 (dd, 1H, J = 13.4 6.8, β-CH<sub>A</sub>H<sub>B</sub> of BPhe), 3.20 (dd, 1H, J = 13.4, 6.4, β-CH<sub>A</sub>H<sub>B</sub> of BPhe), 3.69 (s, 3H, CO<sub>2</sub>CH<sub>3</sub>), 4.40-4.42 (m, 1H, α-CH of HPhe), 4.60 (app. q, J = 6.6, α-CH of BPhe), 5.00 (1H, d, J = 6.6, NH), 6.53 (d, 1H, J = 7.6, NH), 7.14 (2H, d, J = 6.8, ArH), 7.20 (1H, d, J = 7.2, ArH), 7.23-7.29 (2H, m, ArH), 7.33 (2H, d, J = 8.0, ArH), 7.47 (2H, t, J = 6.4, ArH), 7.57-7.62 (1H, m, ArH), 7.72-7.81 (4H, m, ArH). <sup>13</sup>C NMR (100.6 MHz, CDCl<sub>3</sub>, δ): 28.2 (CH<sub>3</sub>, OC(CH<sub>3</sub>)<sub>3</sub>), 31.4 (CH<sub>2</sub>, γ-CH<sub>2</sub> of HPhe), 33.6 (CH<sub>2</sub>, β-CH<sub>2</sub> of HPhe), 38.0 (CH<sub>2</sub>, β-CH<sub>2</sub> of BPhe), 52.1 (CH, α-CH of BPhe), 52.4 (CH<sub>3</sub>, CO<sub>2</sub>CH<sub>3</sub>), 55.5 (CH, α-CH of HPhe), 126.2 (CH, Ar), 128.2 (CH, Ar), 128.3 (CH, Ar), 128.5 (CH, Ar), 129.3 (CH, Ar), 129.9 (CH, Ar), 130.4 (CH, Ar), 132.4 (CH, Ar), 136.2 (C, Ar), 137.6 (C, Ar), 140.5 (C, Ar), 141.6 (C, Ar), 155.3 (C, C=O), 170.6 (C, C=O), 172.0 (C, C=O), 196.3 (C, C=O). m/z (TOF ES<sup>+</sup>) 567.3 ([M + Na]<sup>+</sup>, 100%).

**Npx-D-BPh-D-HPhe-OMe (6)**. Boc-D-BPhe-D-HPhe-OMe (**4**) (229 mg, 0.42 mmol) was dissolved in TFA (2.0 mL) and the reaction mixture was stirred at rt for 30 minutes. The mixture was diluted with CHCl<sub>3</sub> (10 mL) and concentrated under reduced pressure. Additional CHCl<sub>3</sub> (2 × 10 mL) was added and then removed under reduced pressure (to completely remove the residual TFA), to afford H-D-BPh-D-HPhe-OMe•TFA (**5**) as a white

solid, which was dissolved in MeCN (6 mL) and cooled to 0 °C. Naproxen (106 mg, 0.46 mmol), Et<sub>3</sub>N (175  $\mu$ L, 1.26 mmol), and HBTU (175 mg, 0.46 mmol) were added sequentially, with 2 min between each addition, and the mixture was stirred at rt overnight. The solvent was removed under reduced pressure to afford a residue that was partitioned between EtOAc (50 mL) and KHSO<sub>4</sub> (1M, 50 mL). After separation of the phases, the organic phase was thoroughly washed with KHSO<sub>4</sub> (1 M, 3  $\times$  50 mL), NaHCO<sub>3</sub> (1 M, 3  $\times$  50 mL), and brine (3  $\times$  50 mL) and then dried with MgSO<sub>4</sub>. Filtration followed by removal of the solvent under reduced pressure afforded Npx-D-BPhe-D-HPhe-OMe (**6**) as a white solid (234 mg, 85%). <sup>1</sup>H NMR (400 MHz, CDCl<sub>3</sub>,  $\delta$ ): 1.55 (d, 3H, J = 7.2, CH<sub>3</sub> of Npx), 1.94-2.01 (m, 1H,  $\beta$ -CH<sub>A</sub>H<sub>B</sub> of HPhe), 2.12-2.22 (m, 1H,  $\beta$ -CH<sub>A</sub>H<sub>B</sub>), 2.56 (app. t, 2H, J = 8.0,  $\gamma$ -CH<sub>2</sub> of HPhe), 2.99 (dd, 2H, m,  $\beta$ -CH<sub>2</sub> of BPhe), 3.70 (s, 3H, CO<sub>2</sub>CH<sub>3</sub>), 3.84 (s, 3H, OCH<sub>3</sub> of Npx), 4.55 (app. dt, 1H, J = 7.6, 5.2,  $\alpha$ -CH of HPhe), 4.77 (app. dt, 1H, J = 14.0, 7.2,  $\alpha$ -CH of BPhe), 6.02 (br d, 1H, J = 8.0, NH), 6.75 (1H, br d, J = 8.0, NH), 6.94 (d, 2H, J = 8.0, ArH), 7.01-7.13 (m, 4H, ArH), 7.13-7.29 (m, 4H, ArH), 7.40-7.48 (m, 4H, ArH), 7.56-7.65 (m, 4H, ArH), 7.68-7.72 (m, 2H, ArH). <sup>13</sup>C NMR (100.6 MHz, CDCl<sub>3</sub>,  $\delta$ ): 17.9 (CH<sub>3</sub>, CHCH<sub>3</sub> of Npx), 31.4 (CH<sub>2</sub>,  $\gamma$ -CH<sub>2</sub> of HPhe), 33.6 (CH<sub>2</sub>,  $\beta$ -CH<sub>2</sub> of HPhe), 37.4 (CH<sub>2</sub>,  $\beta$ -CH<sub>2</sub> of BPhe), 46.8 (CH<sub>2</sub>, CHCH<sub>3</sub> of Npx), 52.1 (CH,  $\alpha$ -CH of HPhe), 52.4 (CH<sub>3</sub>, CO<sub>2</sub>CH<sub>3</sub>), 53.6 (CH,  $\alpha$ -CH of BPhe), 55.2 (CH<sub>3</sub>, OCH<sub>3</sub> of Npx), 105.6 (CH, Ar), 119.3 (CH, Ar), 125.7 (CH, Ar), 126.1 (CH, Ar), 126.2 (CH, Ar), 127.7 (CH, Ar), 128.2 (CH, Ar), 128.3 (CH, Ar), 128.5 (CH, Ar), 128.8 (C, Ar), 129.1 (CH, Ar), 129.9 (CH, Ar), 130.2 (CH, Ar), 132.3 (CH, Ar), 133.7 (C, Ar), 135.7 (C, Ar), 135.9 (C, Ar), 137.5 (C, Ar), 140.4 (C, Ar), 140.9 (C, Ar), 157.7 (C, Ar), 170.3 (C, C=O), 172.1 (C, C=O), 174.4 (C, C=O), 196.1 (C, C=O). 1  $\times$  (CH, Ar) is missing due to resonance overlap. m/z (TOF ES+) 657.3 ([M + H]<sup>+</sup>, 100%).

*Ind-D-BPh-D-HPhe-OMe (7)*. Boc-D-BPhe-D-HPhe-OMe (**4**) (218 mg, 0.40 mmol) was dissolved in TFA (2 mL) and the reaction mixture was stirred at rt for 30 minutes. The mixture was diluted with CHCl<sub>3</sub> (10 mL) and concentrated under reduced pressure. Additional CHCl<sub>3</sub> (2  $\times$  10 mL) was added and then removed under reduced pressure (to completely remove the residual TFA), to afford H-D-BPh-D-HPhe-OMe•TFA (**5**) as a white solid, which was dissolved in MeCN (6 mL) and cooled to 0 °C. 3-Indolepropionic acid (83 mg, 0.44 mmol), Et<sub>3</sub>N (167  $\mu$ L, 1.20 mmol), and HBTU (167 mg, 0.44 mmol) were added sequentially, with 2 min between each addition, and the mixture was stirred at rt overnight. The solvent was removed under reduced pressure to afford a residue that was partitioned between EtOAc (50 mL) and KHSO<sub>4</sub> (1M, 50 mL). After separation of the phases, the organic phase was thoroughly washed with KHSO<sub>4</sub> (1 M, 3  $\times$  50 mL), NaHCO<sub>3</sub> (1 M, 3  $\times$  50 mL), and brine (3  $\times$  50 mL) and then dried with MgSO<sub>4</sub>. Filtration followed by removal of the solvent under reduced pressure afforded Ind-D-BPhe-D-HPhe-OMe (**7**) as a white solid (202 mg, 82%). <sup>1</sup>H NMR (400 MHz, CDCl<sub>3</sub>,  $\delta$ ): 1.94-2.01 (m, 1H,  $\beta$ -CH<sub>A</sub>H<sub>B</sub> of HPhe), 2.10-2.21 (m, 1H,  $\beta$ -CH<sub>A</sub>H<sub>B</sub> of HPhe), 2.50-2.67 (m, 4H,  $\gamma$ -CH<sub>2</sub> of HPhe and CH<sub>2</sub> of Ind), 2.90-3.13 (m, 4H,  $\beta$ -CH<sub>2</sub> of BPhe and CH<sub>2</sub> of Ind), 3.70 (s, 3H, CO<sub>2</sub>CH<sub>3</sub>), 4.54 (app. dt, 1H, J = 7.6, 5.2,  $\alpha$ -CH of HPhe), 4.76 (app. q, J = 7.2  $\alpha$ -CH of BPhe), 5.99 (br d, 1H, J = 8.4, NH), 6.57 (br d, 1H, J = 8.0, NH), 7.07-7.26 (10H, m, ArH), 7.33 (1H, d, J = 8.0, ArH), 7.48 (2H, t, J = 8.0, ArH), 7.54-7.65 (4H, m, ArH), 7.68-7.72 (2H, m, ArH), 8.22 (br s, 1H, NH). <sup>13</sup>C NMR (100.6 MHz, CDCl<sub>3</sub>,  $\delta$ ): 21.1 (CH<sub>2</sub>, 1  $\times$  CH<sub>2</sub> of Ind), 31.2 (CH<sub>2</sub>,  $\gamma$ -CH<sub>2</sub> of HPhe), 32.6 (CH<sub>2</sub>,  $\beta$ -CH<sub>2</sub> of HPhe), 36.1 (CH<sub>2</sub>, 1  $\times$  CH<sub>2</sub> of Ind), 37.6 (CH<sub>2</sub>,  $\beta$ -CH<sub>2</sub> of BPhe), 51.4 (CH,  $\alpha$ -CH of HPhe), 51.9 (CH<sub>3</sub>, CO<sub>2</sub>CH<sub>3</sub>), 53.2 (CH<sub>2</sub>,  $\alpha$ -CH of BPhe), 111.3 (CH, Ar), 113.7 (C, Ar), 118.1 (CH, Ar), 118.2 (CH, Ar), 120.8 (CH, Ar), 122.1 (CH, Ar), 126.0 (CH, Ar), 127.0 (C, Ar), 128.3 (CH, Ar), 128.4 (CH, Ar), 128.5 (CH, Ar), 129.46 (CH, Ar), 129.5 (CH, Ar), 132.5 (CH, Ar), 135.1 (C, Ar), 136.2 (C, Ar), 137.2 (C, Ar), 140.8 (C, Ar), 143.2 (C, Ar), 171.4 (C, C=O), 172.0 (C, C=O), 172.3 (C, C=O), 195.5 (C, C=O). m/z (TOF ES+) 638.3 ([M + Na]<sup>+</sup>, 100%).

$^1\text{H}$  and  $^{13}\text{C}$  NMR (standard and DEPT) spectra for compound **1**

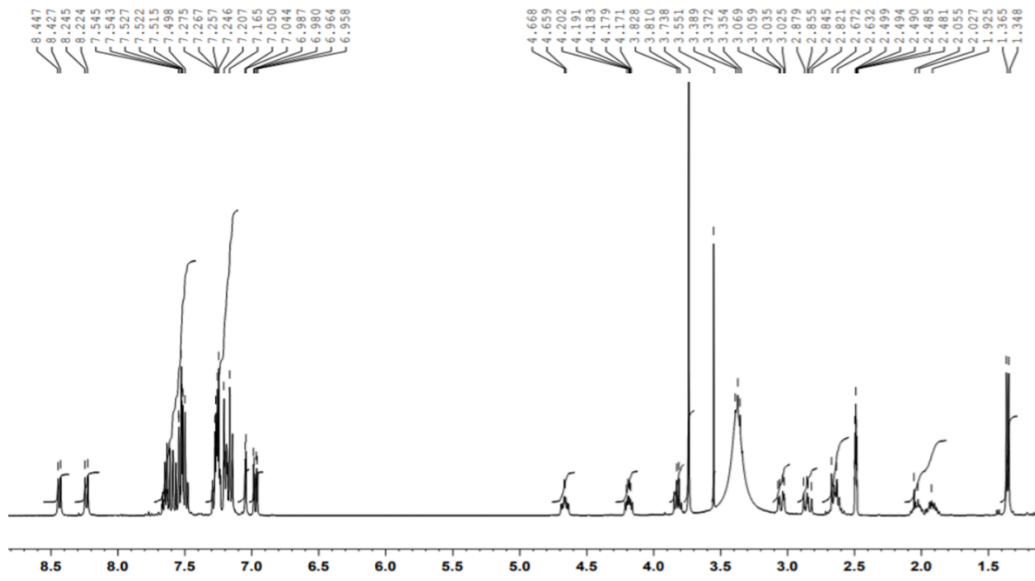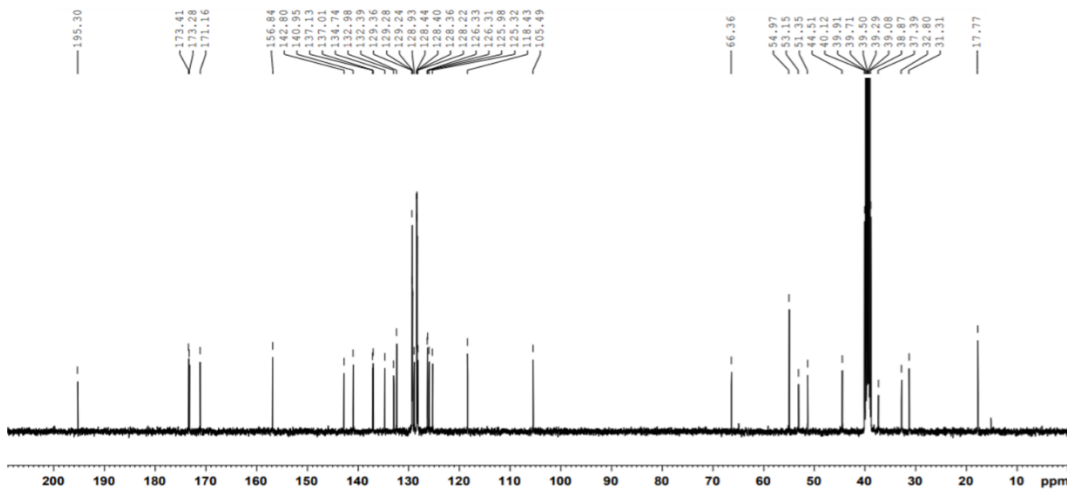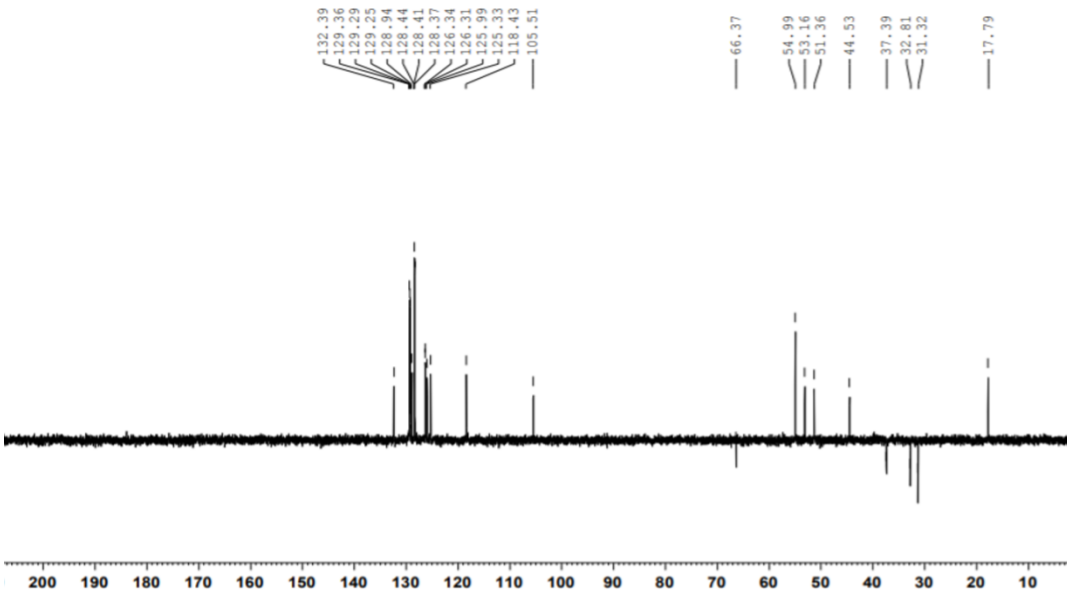

$^1\text{H}$  and  $^{13}\text{C}$  NMR (standard and DEPT) spectra for compound **2**

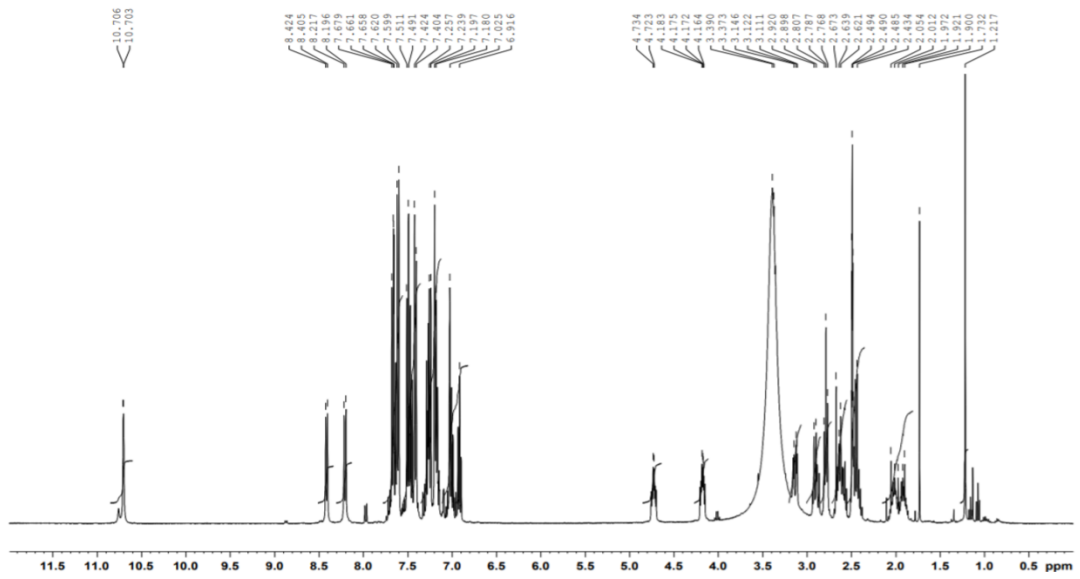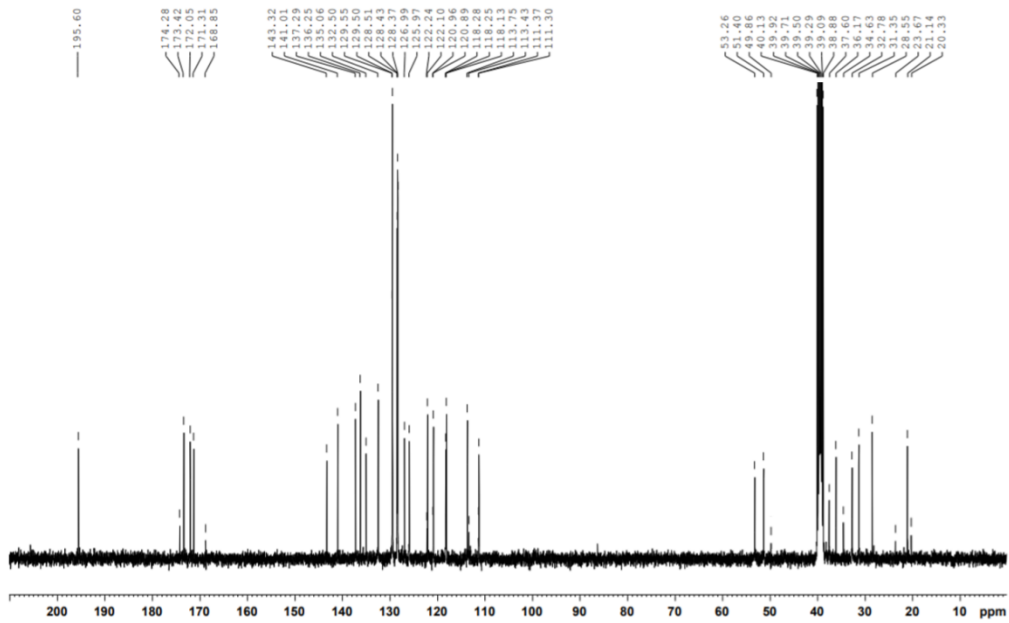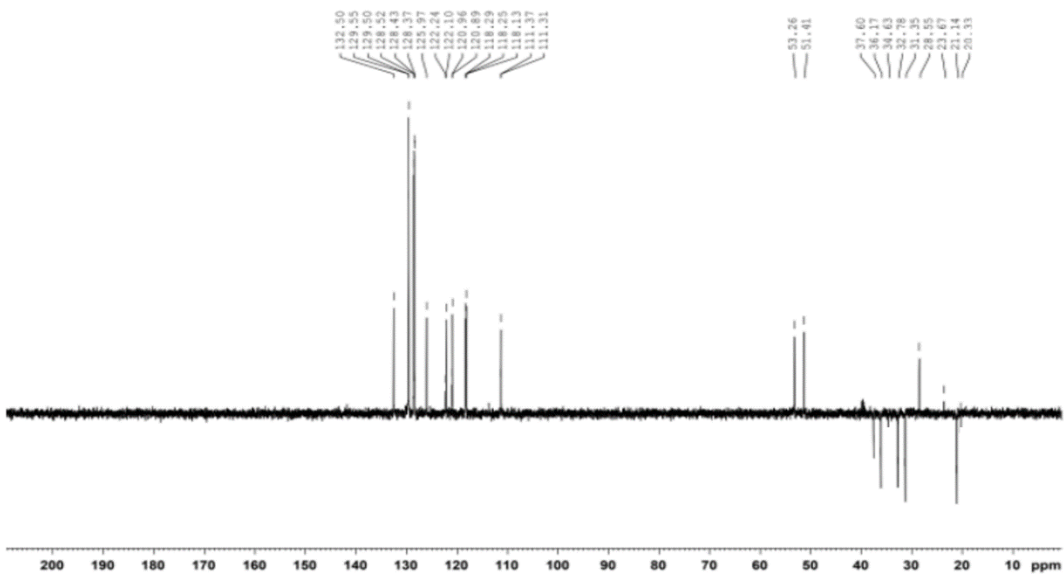

Figures S1 and S2 related to Molecular Dynamics of compounds **1**

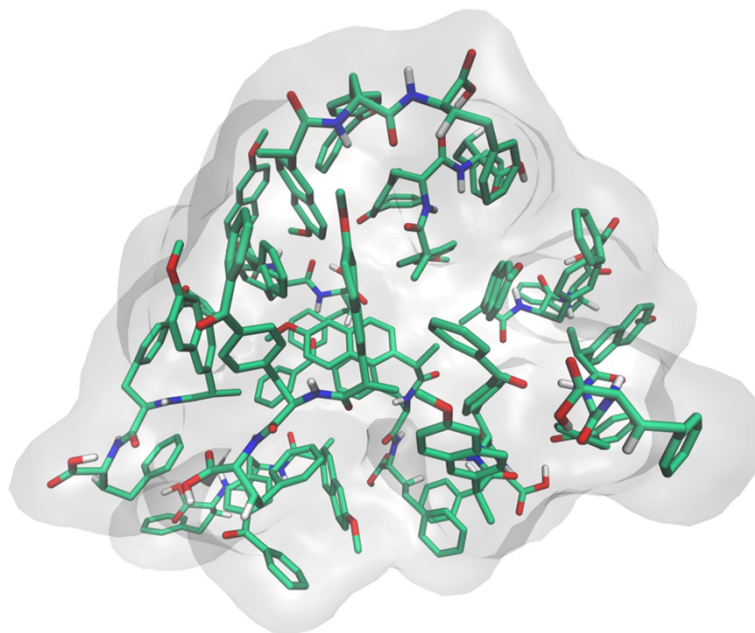

**Figure S1.** MD simulation snapshot from the self-assembly of dipeptide **1** after equilibration. For simplicity, water molecules, non-polar hydrogens, and periodic boundary conditions are not represented.

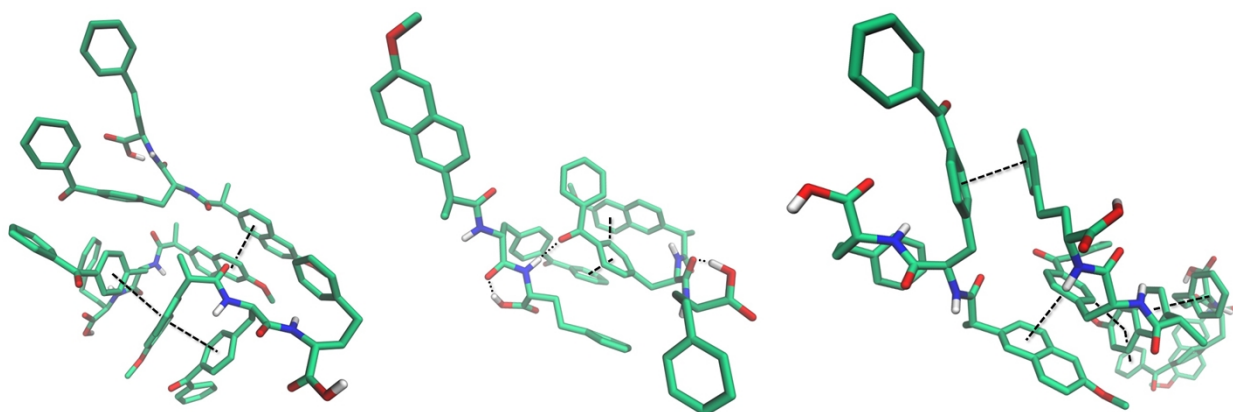

**Figure S2.** Molecular interactions at the simulation endpoint (500 ns) for the dipeptide **1**. Dashed lines represent the  $\pi$ -interactions (sandwich and T-shape) and dotted lines the hydrogen bonds.

## Fitting the Drug Release Data to the Korsmeier-Peppas Model of Release Kinetics

To describe the release of the cargo from the hydrogel network, the Korsmeier-Peppas's model was used. This mathematical model includes both diffusion and erosion of polymer (**Figure S3**).

The following equation describes the Korsmeier-Peppas's model:

$$\frac{M_t}{M} = kt^n$$

$M_t$ : amount of cargo released at time  $t$ ;

$M$ : Total amount of cargo used for the release study;

$k$ : release rate constant incorporating structural and geometric characteristics of drug dosage form;

$n$ : release exponent.

In this model, the  $n$  value is associated with the diffusion mechanism of the drug as described in **Table S1**.<sup>1,2</sup>

**Table S1:** Interpretation of diffusional release mechanisms.

| Release exponent ( $n$ ) | Drug transport mechanism |
|--------------------------|--------------------------|
| 0.5                      | Fickian diffusion        |
| $0.45 < n < 0.89$        | Non – Fickian transport  |
| 0.89                     | Case II transport        |
| Higher than 0.89         | Super case II transport  |

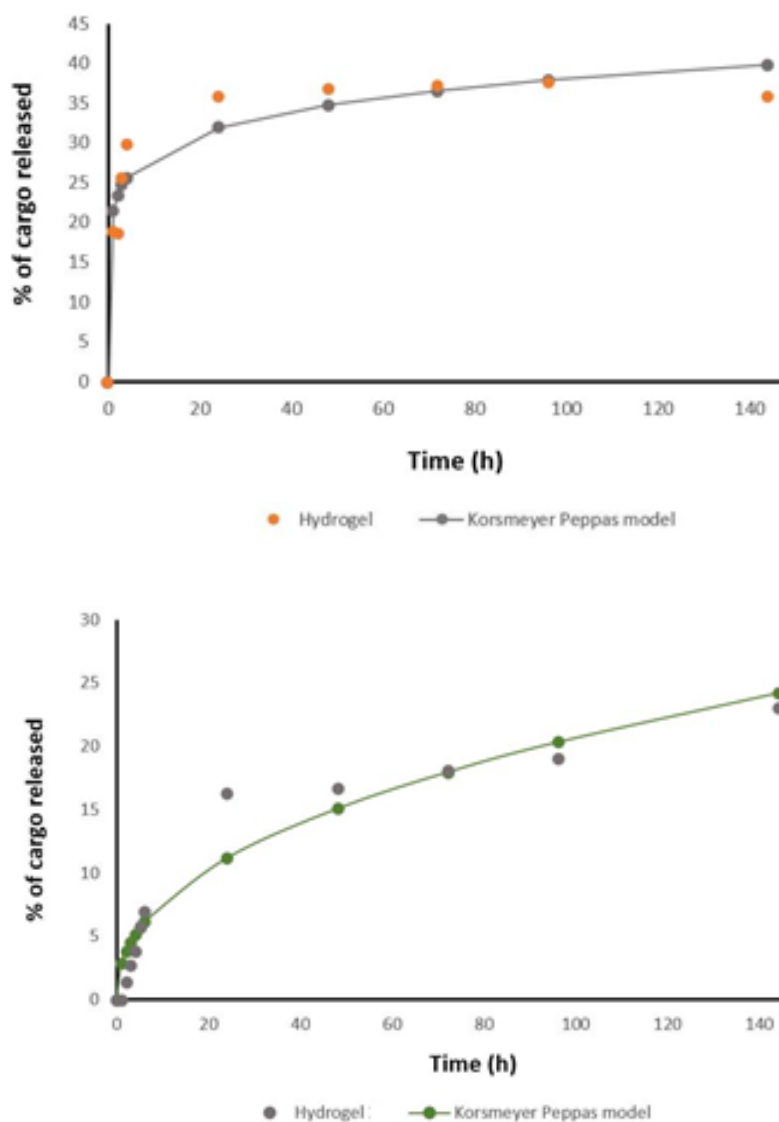

**Figure S3:** Data to Korsmeier-Peppas Model to describe the release kinetics of methyl orange (top) and ciprofloxacin (bottom) from hydrogel 1.

The determined parameters of this model ( $k$  and  $n$ ) and the value of  $R^2$  are presented in **Table S2**. The data show that release of ciprofloxacin from hydrogel 1 is faster (higher  $k$  value) than methyl orange and in both cases is associated with a diffusion-controlled release mechanism ( $n$  value).

**Table S2:** Release coefficients of the Korsmeier-Peppas model obtained for methyl orange and ciprofloxacin release profiles in hydrogels from 1.

| Cargo         | $k$     | $n$    | $R^2$  |
|---------------|---------|--------|--------|
| Methyl Orange | 21.5687 | 0.1235 | 0.9090 |
| Ciprofloxacin | 29.9747 | 0.4309 | 0.9679 |



## Rheology figures:

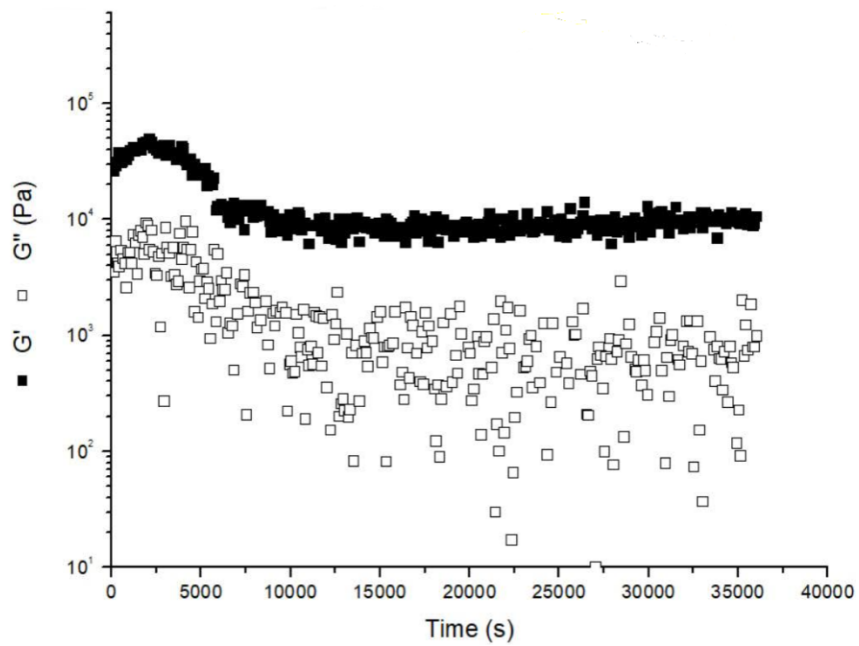

Figure S4: Elastic and viscous modulus during the kinetic process of gelation for compound 1.

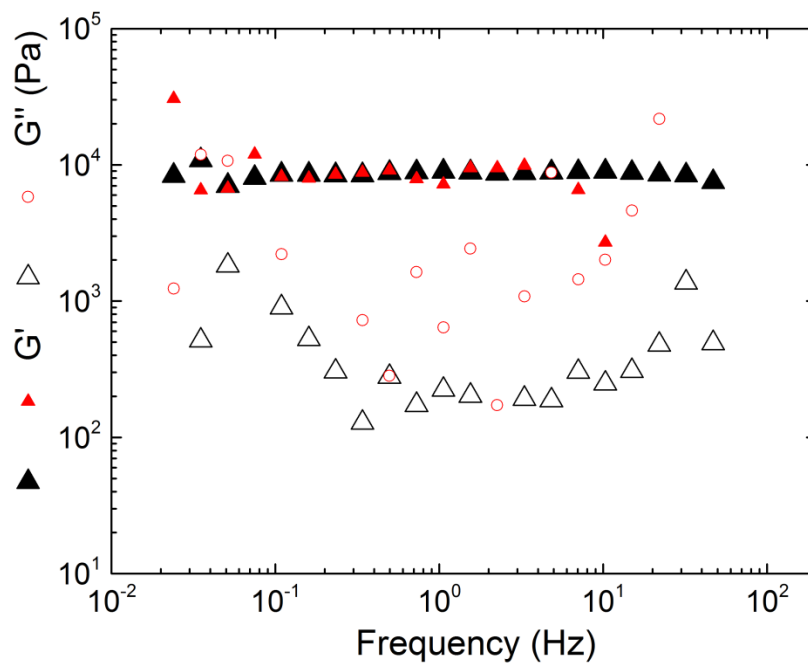

Figure S5: Mechanical spectra of a gel formed from compound 1 after sample loading in the Couette cell and completed gel kinetics (larger black triangles), and of a gel reformed after break-up achieved with a strain sweep (smaller red symbols). The  $G'$  and  $G''$  data for the reformed gel are vertically shifted by a factor of 30 to overlay the  $G'$  and  $G''$  data of the original gel (larger black symbols).

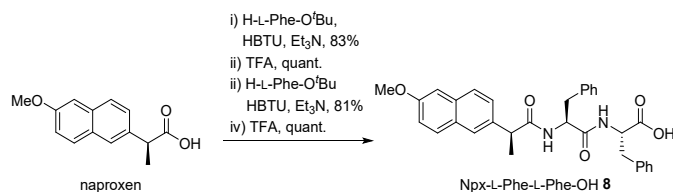

**Figure S6:** Synthesis of Npx-L-Phe-L-Phe-OH **8** (see Reference 3).

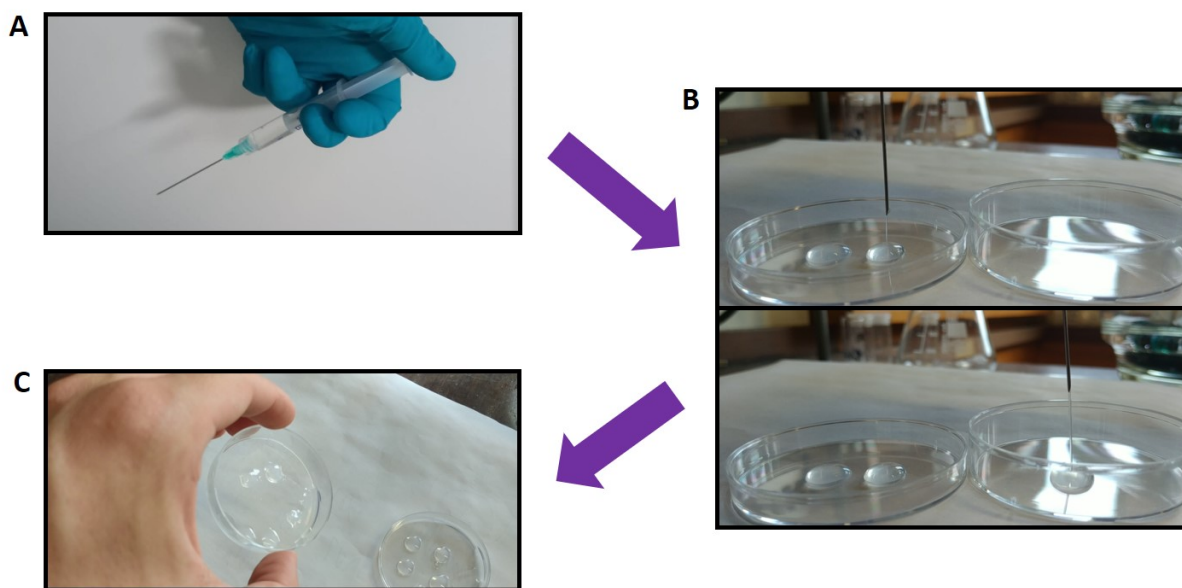

**Figure S7:** Gelation of compound after being expelled from a syringe: A) A hydrogel is formed inside the syringe, using the conditions described in Section 2.2 (pH change method). B) The pressure of expelling the gel through the needle causes a gel to liquid transition. C) Rapid (<1 min) reforming of the gel after leaving the syringe needle. This strain softening followed by gel structural recovery was predicted by the rheological mechanical spectra (Section 3.3).

## References

1. B. L. Abraham, E. S. Toriki, N. J. Tucker, B. L. Nilsson, Electrostatic interactions regulate the release of small molecules from supramolecular hydrogels. *J. Mater. Chem. B.*, 2020, **8**, 6366–6377.
2. S. Dash, P. N. Murthy, L. Nath, P. Chowdhury, Kinetic modeling on drug release from controlled drug delivery systems. *Acta Pol. Pharm.*, 2010, **67**, 217–223.
3. H. Vilaça, G. Pereira, T. G. Castro, B. F. Hermenegildo, J. Shi, T. Q. Faria, N. Micaêlo, R. M. M. Brito, B. Xu, E. M. S. Castanheira, J. A. Martins and P. M. T. Ferreira, *J. Mater. Chem. B*, 2015, **3**, 6355–6367.
